# Supplementary material for: A Rapid-Patterning 3D Vessel-on-Chip for Imaging and Quantitatively Analyzing Cell–Cell Junction Phenotypes
Source: MDPI journal article supplement (doi:10.3390/bioengineering10091080), 2023-09-13
Supplement: s1 [file Supplemental materials.pdf › Supplemental materials.pdf]

Supplemental information for

**A rapid-patterning 3D vessel-on-chip for imaging and quantitatively analyzing cell-cell  
junction phenotypes**

Li Yan<sup>1\*#</sup>, Cole W. Dwiggin<sup>1#</sup>, Udit Gupta, Kimberly M. Stroka<sup>1,2,3,4\*</sup>

**Table S1. Information of antibodies and fluorescent stains**

| Antibody                                                                           | Vendor       | Catalog<br>number | Dilution |
|------------------------------------------------------------------------------------|--------------|-------------------|----------|
| Anti-ZO-1                                                                          | ThermoFisher | 61-7300           | 1:200    |
| Occludin                                                                           | ThermoFisher | 33-1500           | 1:200    |
| Claudin-5                                                                          | Abcam        | Ab15106           | 1:200    |
| Alexa Fluor <sup>TM</sup> 488 Phalloidin                                           | ThermoFisher | A12379            | 1:40     |
| Goat anti-Mouse IgG (H+L)<br>Cross-Adsorbed Secondary<br>Antibody, Alexa Fluor 568 | ThermoFisher | A11011            | 1:1000   |
